# Supplementary material for: Simultaneously Enhancing Aggregation-Induced Emission and Boosting Two-Photon Absorption Performance of Perylene Diimides through Regioisomerization
Source: Research Square preprint supplement (doi:10.21203/rs.3.rs-1027693/v1), 2021-11-18
Supplement: Supplementary file 1 [file dd0081b7d342b3f8fad36740.docx]

**Simultaneously Enhancing Aggregation-Induced Emission and Boosting Two-Photon Absorption Performance of Perylene Diimides through Regioisomerization**

Liang Xu*, Xueting Long, Ziqi Deng, Sirui Yang, Jieyu Wu, Lingfeng Yin, Xiao-Fang Jiang, Fushen Lu, Ming-De Li, Qichun Zhang*

Table of contents

[1. Synthetic details 2](#_Toc86260981)

[1.1 Synthesis of B-PDI-ANT 2](#_Toc86260982)

[1.2 Synthesis of O-PDI-ANT 3](#_Toc86260983)

[2. Results 4](#_Toc86260984)

[2.1 1H and 13C NMR 4](#_Toc86260985)

[2.2 Femtosecond transient absorption spectra and kinetics fitting of B-PDI-ANT and O-PDI-ANT in THF 6](#_Toc86260986)

[2.3 Nanosecond transient absorption spectra and kinetics fitting of O-PDI-ANT in THF 11](#_Toc86260987)

[2.4 Femtosecond transient absorption spectra and kinetics fitting of B-PDI-ANT and O-PDI-ANT in THF-H2O with different *fw* 13](#_Toc86260988)

[2.5 The optimized XYZ coordinates 19](#_Toc86260989)

[2.6 The optimized molecular structures of B-PDI-ANT and O-PDI-ANT in the ground state (S0) and the first excited state (S1) 29](#_Toc86260990)

[2.7 The optimized molecular orbital (MO) diagrams of B-PDI-ANT and O-PDI-ANT 30](#_Toc86260991)

[2.8 The summary of the previously reported 2PA data for small organic molecules containing one or two PDI unit in recent ten years from 2011-2021 31](#_Toc86260992)

[3. References 33](#_Toc86260993)

# 1. Synthetic details

## 1.1 Synthesis of B-PDI-ANT

**Supplementary Scheme 1.** The synthetic route to B-PDI-ANT.

Compounds **1** and **2** were synthesized according to the literature.[1](#_ENREF_1) A mixture of **1** (0.4 g, 0.48 mmol),**2** (0.176 g, 0.58mmol), Pd(PPh3)4 (0.055 g, 0.047mmol), K2CO3(0.132g,0.96mmol),DMF (10 mL) was stirred at 80 °C under N2 atmosphere for 24h. After coolingto room temperature, the solvent was removed under reduced pressure.Then the collected solid was redissolved in dichloromethane (100 mL) and washed with brine (100 mL) twice. The organic layer was dried over NaSO4 and concentrated by the rotary evaporator in vacuum. The crude product was further purified by column chromatography(DCM/petroleum ether=16:1 to 6:1) to give the desired product as the dark purple solid (372 mg, 0.4mmol, 83% yield).1H NMR (400 MHz, CDCl3) δ 8.79-8.61(m,5H), 8.51-8.46(d,2H), 8.36(s,1H), 8.06-7.99(m,4H), 7.96-7.93(d,1H), 7.55-7.51(m, 2H), 7.27-7.25 (d, 1H), 5.26-5.10(m,2H), 2.32-2.14(m,4H), 1.88-1.79(m,4H), 1.32-1.19(m,32H), 0.84-0.78(m,12H).13C NMR (100 MHz, CDCl3) δ 141.84, 140.01, 135.22, 135.00, 134.83, 132.88, 132.71, 131.21, 130.78, 130.66, 129.54, 129.03, 128.73, 128.58, 128.42, 127.89, 127.47, 127.04, 126.52, 126.39, 123.96, 123.13, 55.25, 55.12, 53.87, 32.86, 32.79, 32.23, 32.19, 31.89, 29.69, 27.38, 23.05, 14.50.

## 1.2 Synthesis of O-PDI-ANT

**Supplementary Scheme 2**. The synthetic route to O-PDI-ANT.

Compounds **2** and **3** were synthesized according to the literature.[1c](#_ENREF_3), [2](#_ENREF_4)A mixture of **3** (0.2 g, 0.24 mmol), **2** (0.15 g, 0.48 mmol), Pd(PPh3)4 (0.03 g, 0.025 mmol), K2CO3(0.066g,0.48mmol),DMF (30 mL) was stirred at 80 °C under N2 atmosphere for 24h. After cooling, remove DMF with rotary evaporator.Then the collected solid was redissolved in dichloromethane (100 mL) and washed with brine (100 mL) twice. The organic layer was dried over NaSO4 and concentrated by the rotary evaporator in vacuum. The residue was then purified by silica gel column chromatography (petroleum ether/DCM=6:1 to 1:1). A dark red solid of O-PDI-AN (0.07g, 0.08mmol) was obtained in 33% yield.1H NMR (400 MHz, CDCl3) δ 8.74-8.54(m,7H), 8.38-8.33(d,2H), 8.06(s,1H), 7.97-7.91(d,3H), 7.43(s,3H), 5.20-5.02(m,2H), 2.29-2.21(m,4H), 1.90-1.79(m,4H), 1.34-1.24(m,32H),0.88-0.81(m,12H).13C NMR (100 MHz, CDCl3) δ 134.55, 134.26, 131.98, 131.92, 131.52, 130.85, 130.77, 130.52, 128.58, 128.11, 128.01, 127.53, 126.92, 126.62, 126.39, 126.20, 125.53, 123.27, 123.02, 122.78, 54.75, 53.40, 32.39, 32.22, 31.76, 31.43, 30.19, 29.22, 26.94, 22.61, 14.07.

# 2. Results

## 2.1 1H and 13C NMR


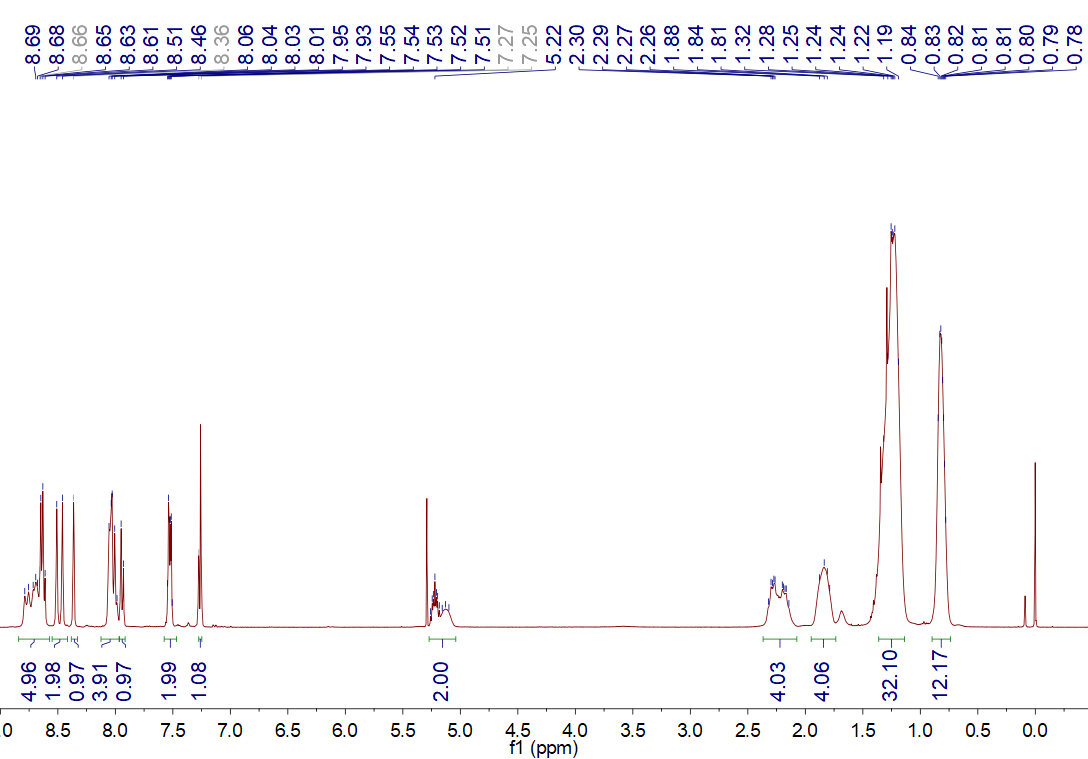


**SupplementaryFigure 1.**1H NMR of B-PDI-ANT in chloroform-d.


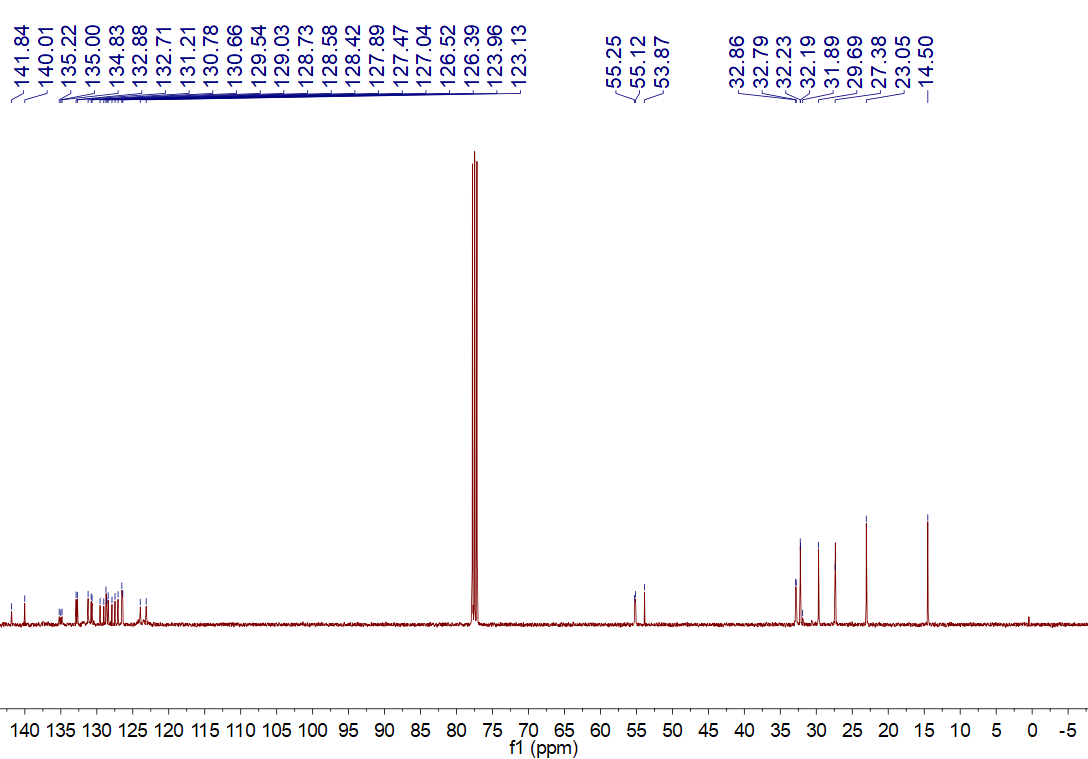


**SupplementaryFigure 2.**13C NMR of B-PDI-ANT in chloroform-d.


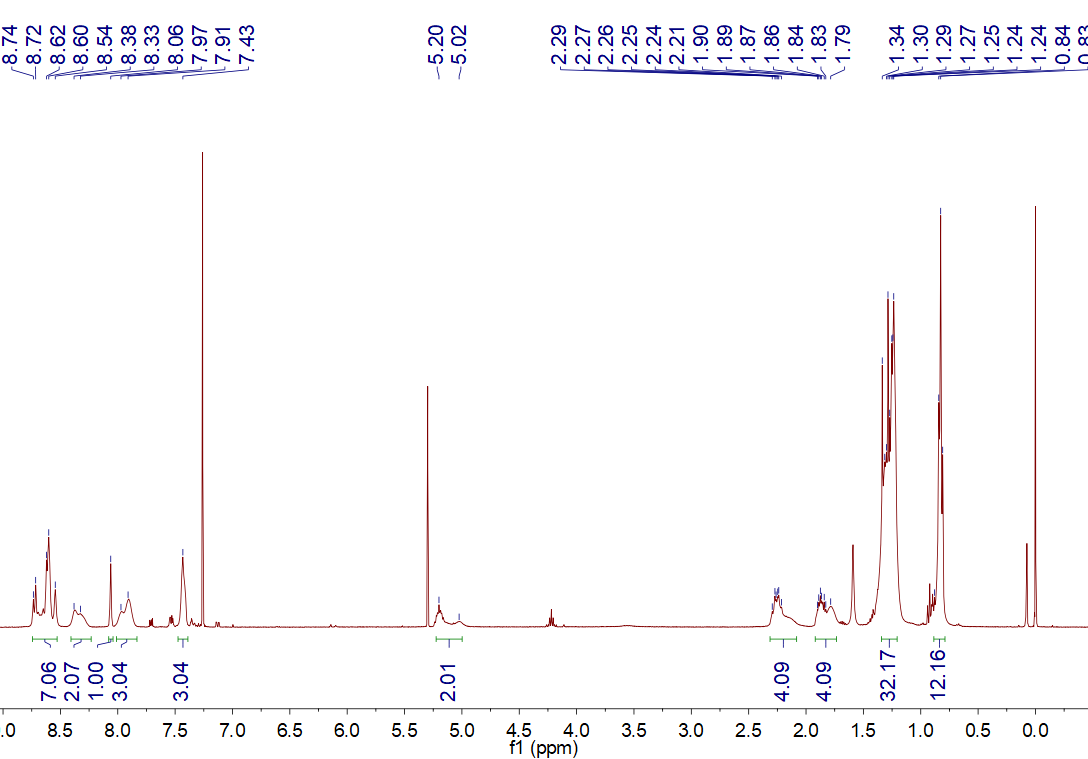


**SupplementaryFigure 3.**1H NMR of O-PDI-ANT in chloroform-d.


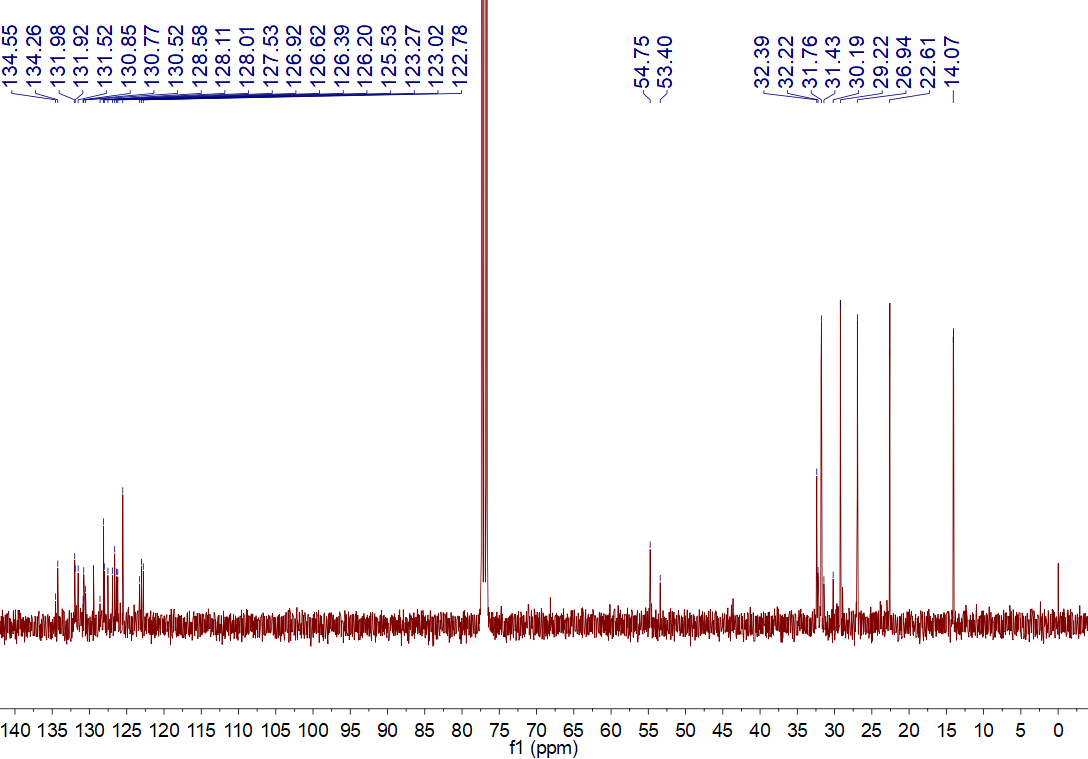


**SupplementaryFigure 4.**13C NMR of O-PDI-ANT in chloroform-d.

## 2.2 Femtosecond transient absorption spectra and kinetics fitting of B-PDI-ANT and O-PDI-ANT in THF

**SupplementaryFigure 5.**Femtosecond transient absorptionspectra(process 1) of B-PDI-ANT in THF.

**SupplementaryFigure 6.**Femtosecond transient absorptionspectra(process 2) of B-PDI-ANT in THF.

**SupplementaryFigure 7.**Global fitting dynamics of B-PDI-ANT in THF.

**SupplementaryFigure 8.**Kinetics fitting of B-PDI-ANTat 430 nm in THF.

**SupplementaryFigure 9.**Femtosecond transient absorptionspectra(process 1) of O-PDI-ANT in THF.

**SupplementaryFigure 10.**Femtosecond transient absorptionspectra(process 2) of O-PDI-ANT in THF.

**SupplementaryFigure 11.**Global fitting of O-PDI-ANT in THF.

**SupplementaryFigure 12.**Wavelength fitting ofO-PDI-ANTat 430 nm in THF.

**Supplementary Table 1**.Summary of the global fitting andwavelength fitting for B-PDI-ANT and O-PDI-ANT in THF

| Sample | Fitting method | τ1 (ps) | τ2 (ps) | τ3 (ps) |
| --- | --- | --- | --- | --- |
| B-PDI-ANT | Global fitting | 0.43 | 1.92 | 250 |
| Wavelength fitting at 430 nm | 0.49 | 1.71 | 220 |
| O-PDI-ANT | Global fitting | 0.36 | 3.00 | 39 |
| Wavelength fitting at 430 nm | 0.21 | 2.34 | 33 |

Global fitting of B-PDI-ANT at all wavelengths gives three time constants: 0.43 ps (τ1), 1.92 ps (τ2) and 250 ps (τ3). Wavelength fitting of B-PDI-ANTat 430 nm gives three very similar time constants: 0.49 ps (τ1), 1.71 ps (τ2) and 220 ps (τ3).Global fitting of O-PDI-ANT at all wavelengths gives three time constants: 0.36 ps (τ1), 3.00 ps (τ2) and 39 ps (τ3). Wavelength fitting of O-PDI-ANTat 430 nm also gives three very similar time constants: 0.21 ps (τ1), 2.34 ps (τ2) and 33 ps (τ3).

## 2.3 Nanosecond transient absorption spectra and kinetics fitting of O-PDI-ANT in THF

**SupplementaryFigure 13.**Nanosecond transient absorptionspectraof O-PDI-ANT in THFpurged withN2.

**SupplementaryFigure 14.**Nanosecond transient absorptionspectraof O-PDI-ANT in THFpurged withO2.

**SupplementaryFigure 15.**Kinetics fitting of O-PDI-ANTat 504 nm in THFpurged withN2 or O2.

Supplementary figure 13shows that the signals (470 and 504 nm) generated by ISC are gradually decreased to the baseline from 7.51 ns to 2.94μs. The kinetic fitting at 504 nm shows that O-PDI-ANT has a long lifetime of τ1 = 2.7μs. When the solution is purged with oxygen (Supplementary figure 14), the long-lifetime transient state is significantly quenched by the oxygen and the lifetime dropsdown to 0.0465μs. This demonstrates that the long-lifetime transient statewith main peaks at 470 and 504 nm of O-PDI-ANT has a triplet-state nature.

## 2.4 Femtosecond transient absorption spectra and kinetics fitting of B-PDI-ANT and O-PDI-ANT in THF-H2O with different *fw*

**SupplementaryFigure 16.**Femtosecond transient absorptionspectra(process 1) of B-PDI-ANT in THF/H2O (*fw* = 60%).

**SupplementaryFigure 17.**Femtosecond transient absorptionspectra(process 2) of B-PDI-ANT in THF/H2O (*fw* = 60%).

**SupplementaryFigure 18.**Femtosecond transient absorptionspectra(process 3) of B-PDI-ANT in THF/H2O (*fw* = 60%).

**SupplementaryFigure 19.**Kinetics fitting of B-PDI-ANTat 430 nm in THF/H2O (*fw* = 60%).

**SupplementaryFigure 20.**Femtosecond transient absorptionspectra(process 1) of B-PDI-ANT in THF/H2O (*fw* = 90%).

**SupplementaryFigure 21.**Femtosecond transient absorptionspectra(process 2) of B-PDI-ANT in THF/H2O (*fw* = 90%).

**SupplementaryFigure 22.**Femtosecond transient absorptionspectra(process 3) of B-PDI-ANT in THF/H2O (*fw* = 90%).

**SupplementaryFigure 23.**Kinetics fitting of B-PDI-ANTat 430 nm in THF/H2O (*fw* = 90%).

**SupplementaryFigure 24.**Femtosecond transient absorptionspectra(process 1) of O-PDI-ANT in THF/H2O (*fw* = 60%).

**SupplementaryFigure 25.**Femtosecond transient absorptionspectra(process 2) of O-PDI-ANT in THF/H2O (*fw* = 60%).

**SupplementaryFigure 26.**Femtosecond transient absorptionspectra(process 3) of O-PDI-ANT in THF/H2O (*fw* = 60%).

**SupplementaryFigure 27.**Kinetics fitting ofO-PDI-ANTat 430 nm in THF/H2O (*fw* = 60%).

**Supplementary Table 2**.Summary of the wavelength fitting for B-PDI-ANT and O-PDI-ANT at 430 nm in THF/H20 with different *fw*.

|  | fw (%) | τ1 (ps) (amplitude) | τ2 (ps) (amplitude) | τ3 (ps) (amplitude) |
| --- | --- | --- | --- | --- |
| B-PDI-ANT | 0 | 0.49 (33.5%) | 1.71 (27.6%) | 220 (38.5%) |
|  | 60 | 0.107 (44.6%) | 2.99 (9.08%) | 152 (31.3%) |
|  | 90 | 0.219 (71%) | 3.73 (8.39%) | 91 (14.9%) |
| O-PDI-ANT | 0 | 0.205 (39.3%) | 2.34 (28.6%) | 32.5 (30.4%) |
|  | 60 | 0.0908 (80%) | 2.75 (10.8%) | 201 (7.95%) |

**SupplementaryFigure 28.**The obtained amplitude of rotation (τ3) for B-PDI-ANT andO-PDI-ANT in THF/H20 with different *fw*.

## 2.5 The optimized XYZ coordinates

S0of B-PDI-ANT

C -5.00442 0.44034 -0.02777

N -5.64676 -0.80101 0.08161

C -4.96579 -1.99497 0.32045

C 5.09953 -1.8745 0.31904

N 5.74392 -0.73117 -0.15329

C 5.05924 0.38678 -0.65322

O -5.55734 -3.04318 0.5077

O -5.64177 1.47142 -0.14661

O 5.72097 -2.86418 0.66347

O 5.66106 1.3261 -1.1422

C 7.23271 -0.65483 -0.21579

C -7.13581 -0.76624 -0.00952

C -7.74278 -1.87416 -0.87545

C -7.79083 -0.59986 1.36915

C 7.9461 -1.1456 1.04754

C 7.78197 -1.23549 -1.52677

C -3.48178 -1.95054 0.33054

C -3.5228 0.45279 -0.00399

C -2.78894 -0.73756 0.15262

C -2.77767 -3.11425 0.5282

C -1.38082 -3.08728 0.56792

C -0.66529 -1.91232 0.40035

C -1.37296 -0.69851 0.14867

C -0.69565 0.54467 -0.07422

C -1.45041 1.72534 -0.09792

C -2.85992 1.64794 -0.08727

C 3.61698 -1.84645 0.39441

C 3.58149 0.39045 -0.55626

C 2.88888 -0.71478 -0.02296

C 1.4742 -0.69778 0.06569

C 0.80113 -1.88052 0.48075

C 1.55081 -2.96859 0.89852

C 2.94891 -2.95114 0.86821

C 2.87402 1.47341 -1.01746

C 1.4801 1.5198 -0.88599

C 0.76443 0.48798 -0.2973

C -7.14761 -1.96451 -2.27932

C -7.68568 -1.75609 2.36311

C -8.45214 -1.46787 3.65369

C -7.88728 -2.96142 -3.16965

C -8.35485 -2.59562 4.6788

C -9.12228 -2.31294 5.96889

C -7.29325 -3.07853 -4.57165

C -8.03249 -4.07394 -5.46375

C -9.01775 -3.44526 6.98667

C -7.43062 -4.18502 -6.86171

C 7.65621 -2.74096 -1.75859

C 7.45499 -0.4885 2.33599

C 8.31878 -3.17249 -3.06659

C 8.30035 -0.86919 3.55011

C 7.81275 -0.23548 4.85117

C 8.19745 -4.67012 -3.33964

C 8.86125 -5.10657 -4.64424

C 8.65875 -0.61336 6.06552

C 8.16342 0.02381 7.36069

C 8.73366 -6.60432 -4.9077

H 7.40933 0.41949 -0.27527

H -7.31591 0.17253 -0.53417

H -8.80946 -1.62698 -0.95992

H -7.67633 -2.84476 -0.38455

H -8.85228 -0.38693 1.18388

H -7.37959 0.31001 1.82319

H 9.00432 -0.8901 0.90272

H 7.88779 -2.22959 1.14227

H 8.84393 -0.95807 -1.56738

H 7.30194 -0.69779 -2.35354

H -3.32412 -4.04077 0.66116

H -0.85741 -4.02158 0.72777

H -3.44365 2.56015 -0.12994

H 1.05901 -3.86466 1.25619

H 3.5254 -3.80973 1.19275

H 3.41391 2.29855 -1.46759

H 0.96386 2.39235 -1.25672

H -6.09336 -2.2606 -2.21654

H -7.16235 -0.97255 -2.75213

H -6.63551 -1.95337 2.60331

H -8.06558 -2.67954 1.91194

H -9.50941 -1.28331 3.41723

H -8.07657 -0.53718 4.10156

H -8.94319 -2.66753 -3.2464

H -7.88048 -3.94866 -2.68836

H -7.29834 -2.77886 4.91842

H -8.72854 -3.5269 4.23139

H -10.178 -2.13137 5.72892

H -8.74847 -1.38226 6.41525

H -6.23801 -3.37531 -4.49564

H -7.29606 -2.09034 -5.05235

H -9.08648 -3.77683 -5.5403

H -8.02954 -5.06077 -4.98303

H -9.57569 -3.21764 7.90032

H -7.9749 -3.62638 7.26936

H -9.41497 -4.38083 6.57786

H -7.97841 -4.90357 -7.47926

H -6.38617 -4.51265 -6.81656

H -7.45056 -3.21881 -7.37777

H 6.60099 -3.03376 -1.77492

H 8.10426 -3.2917 -0.92396

H 6.41373 -0.77664 2.52508

H 7.45702 0.60416 2.2184

H 9.38135 -2.89251 -3.04767

H 7.87483 -2.61419 -3.90268

H 9.34442 -0.57627 3.3731

H 8.30516 -1.96222 3.65764

H 6.76975 -0.53093 5.03084

H 7.80344 0.85802 4.74277

H 7.13537 -4.95061 -3.362

H 8.63943 -5.22905 -2.50337

H 9.92258 -4.8271 -4.62078

H 8.41904 -4.54781 -5.47934

H 9.70055 -0.31773 5.88595

H 8.66763 -1.70569 6.17341

H 8.78646 -0.26277 8.21359

H 7.13477 -0.28131 7.58214

H 8.17502 1.11716 7.29207

H 9.21704 -6.89011 -5.84713

H 7.68218 -6.90583 -4.96871

H 9.1968 -7.18694 -4.10381

C -0.89032 3.1051 -0.05108

C -1.26403 4.0506 -0.96346

C -0.02038 3.48119 1.02687

C -0.7908 5.39686 -0.88673

H -1.92799 3.78496 -1.78188

C 0.44232 4.75236 1.13948

H 0.25501 2.73093 1.76073

C -1.15498 6.36314 -1.82255

C 0.085 5.75886 0.18793

H 1.09197 5.02802 1.96533

C -0.68662 7.67501 -1.73787

H -1.82036 6.08936 -2.63758

C 0.55276 7.06743 0.27441

C -1.05202 8.67521 -2.69014

C 0.18988 8.03661 -0.66252

H 1.21641 7.34139 1.09078

C -0.57968 9.94728 -2.58308

H -1.71693 8.39727 -3.50305

C 0.66308 9.38204 -0.5869

C 0.29177 10.30637 -1.51469

H -0.86468 10.69859 -3.31282

H 1.32736 9.65168 0.22932

H 0.65809 11.32585 -1.44646

S1 of B-PDI-ANT

C -0.28477900 5.00662400 -0.29231100

N -1.41262000 5.82216300 -0.18780700

C -2.71525600 5.36480000 0.01064900

C -4.18591800 -4.54067700 0.12296900

N -3.12703600 -5.33983000 -0.30612500

C -1.86952700 -4.86661800 -0.68649600

O -3.63616800 6.16036100 0.10232600

O 0.83019600 5.47861900 -0.45287000

O -5.25852000 -5.04598300 0.41387300

O -0.99708100 -5.62624200 -1.07855100

C -3.38590200 -6.77427300 -0.38170300

C -1.24271500 7.26915800 -0.27390000

C -2.90933500 3.90802000 0.09881100

C -0.51698000 3.55492800 -0.19959600

C -1.82073800 3.03725300 -0.01050600

C -4.19751200 3.39983300 0.28912500

C -4.40343800 2.04156300 0.36443000

C -3.33354700 1.12409100 0.24646300

C -2.01659600 1.62686200 0.05164600

C -0.89908900 0.75506100 -0.09556500

C 0.42903000 1.32237800 -0.07373800

C 0.57231300 2.70527400 -0.20000200

C -3.94197200 -3.09106200 0.19855600

C -1.65430900 -3.41331300 -0.58129600

C -2.68549700 -2.55890400 -0.13894700

C -2.45890200 -1.15479000 -0.04591900

C -3.53628100 -0.30184700 0.30517200

C -4.78006800 -0.88109700 0.64769200

C -4.97343200 -2.24558100 0.60479500

C -0.42887800 -2.87910600 -0.97167200

C -0.18697000 -1.52534700 -0.85932500

C -1.15810000 -0.63929300 -0.32231700

H -2.44003700 -7.27023500 -0.58870500

H -0.18819400 7.46711300 -0.45068700

H -5.01935700 4.10229800 0.36640000

H -5.41407200 1.67443100 0.48820000

H 1.55754300 3.15677400 -0.20633200

H -5.60092700 -0.24838300 0.96063100

H -5.92589900 -2.68951800 0.87074000

H 0.31993500 -3.55146300 -1.37424800

H 0.75256100 -1.12923500 -1.21838200

C 1.63708100 0.55040500 0.23408700

C 2.83249300 0.82223300 -0.40637500

C 1.63234400 -0.43837500 1.27958000

C 4.03139800 0.14606500 -0.07433600

H 2.85852900 1.55501300 -1.20728000

C 2.76892700 -1.08546600 1.63855100

H 0.70421700 -0.63593700 1.80321900

C 5.23373500 0.41039900 -0.74085800

C 4.01192800 -0.83181500 0.97670300

H 2.75194100 -1.81143300 2.44608900

C 6.41381100 -0.24759700 -0.40177300

H 5.24599100 1.14993600 -1.53724000

C 5.18793400 -1.48783200 1.31377900

C 7.64818100 0.01669600 -1.07028600

C 6.39278500 -1.22104000 0.65197500

H 5.17584100 -2.22668300 2.11078900

C 8.78697700 -0.64082000 -0.71626700

H 7.65808800 0.75492900 -1.86679600

C 7.60544300 -1.88626600 0.99090900

C 8.76474700 -1.60578900 0.32926700

H 9.72017400 -0.43268500 -1.22931400

H 7.58835000 -2.62275200 1.78887000

H 9.68213600 -2.11963900 0.59814500

H -3.81026700 -7.11648400 0.56363500

H -4.10383700 -6.98735300 -1.17883500

H -1.56999700 7.73827100 0.65726200

H -1.85285300 7.66423900 -1.08869700

S0 of O-PDI-ANT

C 5.82012 -0.26082 0.12321

N 6.44564 -1.45797 0.47132

C 5.74462 -2.59949 0.88624

C -4.32713 -2.40617 0.63178

N -4.96278 -1.24328 0.21759

C -4.28067 -0.04449 -0.05303

O 6.33247 -3.60012 1.25635

O 6.45795 0.73995 -0.14946

O -4.9492 -3.40034 0.96348

O -4.90973 0.97908 -0.24137

C -6.45152 -1.1655 0.13571

C 7.93307 -1.57821 0.47258

C 8.61421 -1.00421 -0.77337

C 8.54557 -1.12357 1.80512

C -7.10955 -2.36871 -0.54664

C -7.0819 -0.76936 1.47842

C 4.26436 -2.55193 0.85141

C 4.33548 -0.24636 0.08798

C 3.58669 -1.38397 0.44952

C 3.5461 -3.66576 1.21461

C 2.1476 -3.6457 1.18058

C 1.44157 -2.5199 0.789

C 2.16946 -1.35235 0.41501

C 1.51428 -0.15319 0.0094

C 2.28729 0.94362 -0.33401

C 3.68543 0.90215 -0.29535

C -2.84548 -2.39329 0.65587

C -2.79399 -0.07167 -0.10567

C -2.10664 -1.24613 0.29299

C -0.68841 -1.29162 0.33743

C -0.03054 -2.48889 0.74651

C -0.80032 -3.58613 1.09137

C -2.19522 -3.53931 1.04759

C -2.06848 1.05439 -0.47722

C -0.66099 0.99339 -0.42225

C 0.04207 -0.12593 -0.02853

C 8.05969 -1.54514 -2.08993

C 8.48011 0.36082 2.16338

C 9.2083 0.66229 3.47297

C 8.8735 -1.09518 -3.30187

C 9.14979 2.13546 3.87125

C 9.88169 2.44264 5.17633

C 8.32349 -1.61631 -4.62787

C 9.13902 -1.17228 -5.84066

C 9.81639 3.91698 5.56524

C 8.58212 -1.69879 -7.16039

C -6.99962 -1.76416 2.63582

C -6.53287 -2.7006 -1.92154

C -7.73907 -1.25678 3.87362

C -7.31924 -3.79507 -2.6409

C -6.74216 -4.15812 -4.0074

C -7.66462 -2.21713 5.0586

C -8.4064 -1.71488 6.29581

C -7.52641 -5.25403 -4.72649

C -6.94001 -5.61297 -6.08893

C -8.3256 -2.68108 7.47427

H -6.60714 -0.31074 -0.5229

H 8.0797 -2.65799 0.43704

H 9.66974 -1.29542 -0.68917

H 8.58162 0.08504 -0.77954

H 9.59821 -1.43637 1.78331

H 8.07682 -1.71249 2.60314

H -8.1662 -2.09369 -0.66469

H -7.07708 -3.25363 0.08816

H -8.13864 -0.55244 1.272

H -6.63589 0.18457 1.78385

H 4.08315 -4.55507 1.52394

H 1.62296 -4.54628 1.47286

H 1.81789 1.86863 -0.64369

H 4.27593 1.7702 -0.56503

H -0.33236 -4.51046 1.40481

H -2.7918 -4.40219 1.31996

H 7.02137 -1.21547 -2.21824

H 8.03304 -2.64326 -2.05658

H 7.43698 0.68366 2.24738

H 8.91367 0.96434 1.35809

H 10.25903 0.35193 3.38636

H 8.77897 0.0511 4.27927

H 9.9141 -1.42801 -3.18521

H 8.90622 0.00242 -3.32759

H 8.09976 2.44584 3.96294

H 9.57577 2.74737 3.06419

H 10.93103 2.1337 5.08345

H 9.45591 1.83093 5.98243

H 7.28434 -1.27989 -4.7479

H 8.2849 -2.71426 -4.60001

H 10.17717 -1.50821 -5.72027

H 9.1766 -0.07555 -5.86892

H 10.34796 4.10995 6.50235

H 8.77919 4.2445 5.69678

H 10.26512 4.54916 4.79107

H 9.18462 -1.3672 -8.01167

H 7.55602 -1.35091 -7.32285

H 8.56374 -2.79416 -7.17166

H -5.95292 -1.95698 2.8947

H -7.41441 -2.73263 2.33462

H -5.49045 -3.02497 -1.8173

H -6.51481 -1.79507 -2.54425

H -8.7929 -1.075 3.62021

H -7.32813 -0.28169 4.17044

H -8.36331 -3.47488 -2.76129

H -7.34746 -4.69264 -2.0086

H -5.69848 -4.48001 -3.88714

H -6.71111 -3.26044 -4.64052

H -6.61152 -2.39653 5.3155

H -8.07316 -3.19302 4.76223

H -9.45853 -1.53635 6.03857

H -7.99747 -0.73997 6.59141

H -8.56855 -4.93154 -4.84863

H -7.55824 -6.14979 -4.09287

H -7.52035 -6.39924 -6.58167

H -5.90885 -5.97048 -5.99286

H -6.92631 -4.74269 -6.75426

H -8.86487 -2.29817 8.34626

H -7.28563 -2.85144 7.77376

H -8.7576 -3.65428 7.21665

H -0.13355 1.88675 -0.72949

C -2.6431 2.33807 -0.96986

C -3.38518 2.38072 -2.19504

C -2.3705 3.50164 -0.31309

C -3.82326 3.55979 -2.70187

H -3.58837 1.45154 -2.71636

C -2.83678 4.76246 -0.79858

H -1.8039 3.48525 0.61424

C -3.57668 4.79577 -2.02446

H -4.37847 3.58322 -3.63525

C -2.58711 5.95414 -0.12161

C -4.0282 6.01861 -2.51332

C -3.04147 7.18092 -0.60845

H -2.02728 5.9288 0.81017

C -3.78076 7.21415 -1.83587

H -4.58999 6.04347 -3.44386

C -2.79455 8.40991 0.07634

C -4.24114 8.47499 -2.32387

C -3.25018 9.59199 -0.42188

H -2.23429 8.38005 1.00674

C -3.98528 9.62491 -1.6417

H -4.80197 8.49566 -3.25416

H -3.05597 10.51919 0.1083

H -4.3414 10.57672 -2.02307

S1 of O-PDI-ANT

C 5.24635900 -3.63290500 0.13694600

N 6.56665100 -3.19141200 0.08412700

C 6.95824700 -1.85515700 -0.00183400

C -0.26867400 5.09398200 -0.23695500

N -1.58801300 4.66363100 -0.18738500

C -1.99505500 3.32883300 -0.13871600

O 8.13668500 -1.53699200 -0.04213200

O 4.99708000 -4.82517900 0.21422400

O 0.01491800 6.27947900 -0.31673000

O -3.18383800 3.06623200 -0.21682200

C -2.64508700 5.66750200 -0.27424400

C 7.59749800 -4.22460800 0.12815400

C 5.87827300 -0.85192700 -0.04078600

C 4.19339900 -2.60373900 0.09618000

C 4.52674100 -1.23957500 0.01114600

C 6.21494400 0.50008000 -0.12775800

C 5.23036900 1.46188100 -0.16417000

C 3.85363800 1.11909800 -0.11157000

C 3.49775500 -0.25348700 -0.02045600

C 2.13957600 -0.66571900 0.04210900

C 1.85170400 -2.05404200 0.11556400

C 2.85484400 -2.99691300 0.14242500

C 0.76023000 4.04211700 -0.19911100

C -0.94477700 2.29779500 0.00493600

C 0.41531300 2.68070500 -0.08785200

C 1.45653200 1.70436800 -0.06595700

C 2.81534100 2.11397500 -0.14537300

C 3.10463000 3.49830000 -0.25246800

C 2.09873300 4.43406900 -0.27965900

C -1.28292400 0.93364200 0.16099700

C -0.26160400 -0.00310100 0.15879100

C 1.10569900 0.33373300 0.03483800

H -3.45497900 5.38749600 0.39823200

H 8.56218500 -3.73335800 0.03528500

H 7.26508400 0.76542400 -0.16483100

H 5.52690500 2.50029300 -0.23034700

H 0.82429300 -2.39206000 0.14571000

H 2.63336500 -4.05635500 0.20062600

H 4.13017100 3.83647200 -0.31819400

H 2.31206200 5.49326300 -0.36280700

H -0.54808800 -1.03659300 0.30021100

C -2.66083100 0.42082800 0.39412600

C -3.39317200 0.83561100 1.55452400

C -3.19110700 -0.53156000 -0.42570800

C -4.60131000 0.29317000 1.84541500

H -2.96008400 1.58702400 2.20589000

C -4.47411700 -1.10833000 -0.17076400

H -2.64739200 -0.85452400 -1.30956400

C -5.19473700 -0.69299800 0.99574600

H -5.14403100 0.60586000 2.73280600

C -5.03871200 -2.06255100 -1.01440500

C -6.43910600 -1.25608300 1.26374900

C -6.28902200 -2.62496800 -0.75019500

H -4.49469600 -2.37554500 -1.90233600

C -7.00677100 -2.21263300 0.41984600

H -6.98439400 -0.94106300 2.15007600

C -6.88161000 -3.60073500 -1.60852400

C -8.28389500 -2.79576500 0.68149400

C -8.10260600 -4.13261700 -1.32508000

H -6.33571200 -3.90915300 -2.49573400

C -8.81474600 -3.72402000 -0.16108100

H -8.82394900 -2.48024600 1.56997700

H -8.54254600 -4.87277600 -1.98606800

H -9.78695500 -4.15933100 0.04873600

H 7.53583500 -4.77123400 1.07089200

H 7.44390700 -4.93191600 -0.68813200

H -2.21710100 6.62920500 -0.00045300

H -3.04286400 5.71772400 -1.29142200

## 2.6 The optimized molecular structures of B-PDI-ANT and O-PDI-ANT in the ground state (S0) and the first excited state (S1)

**
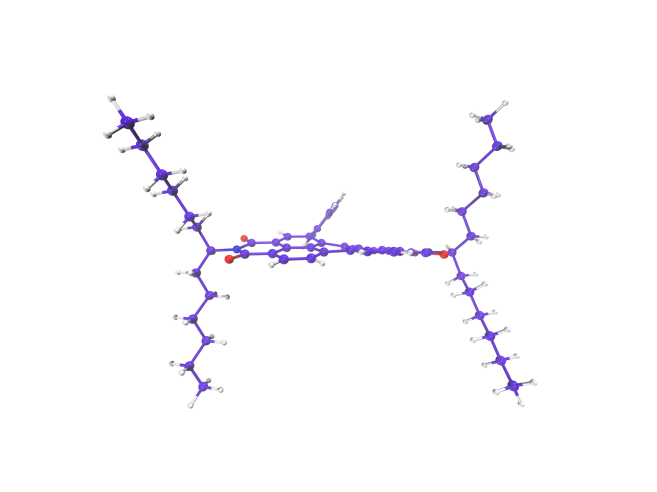
**

**SupplementaryFigure 29.**Theoptimized S0 of B-PDI-ANT.


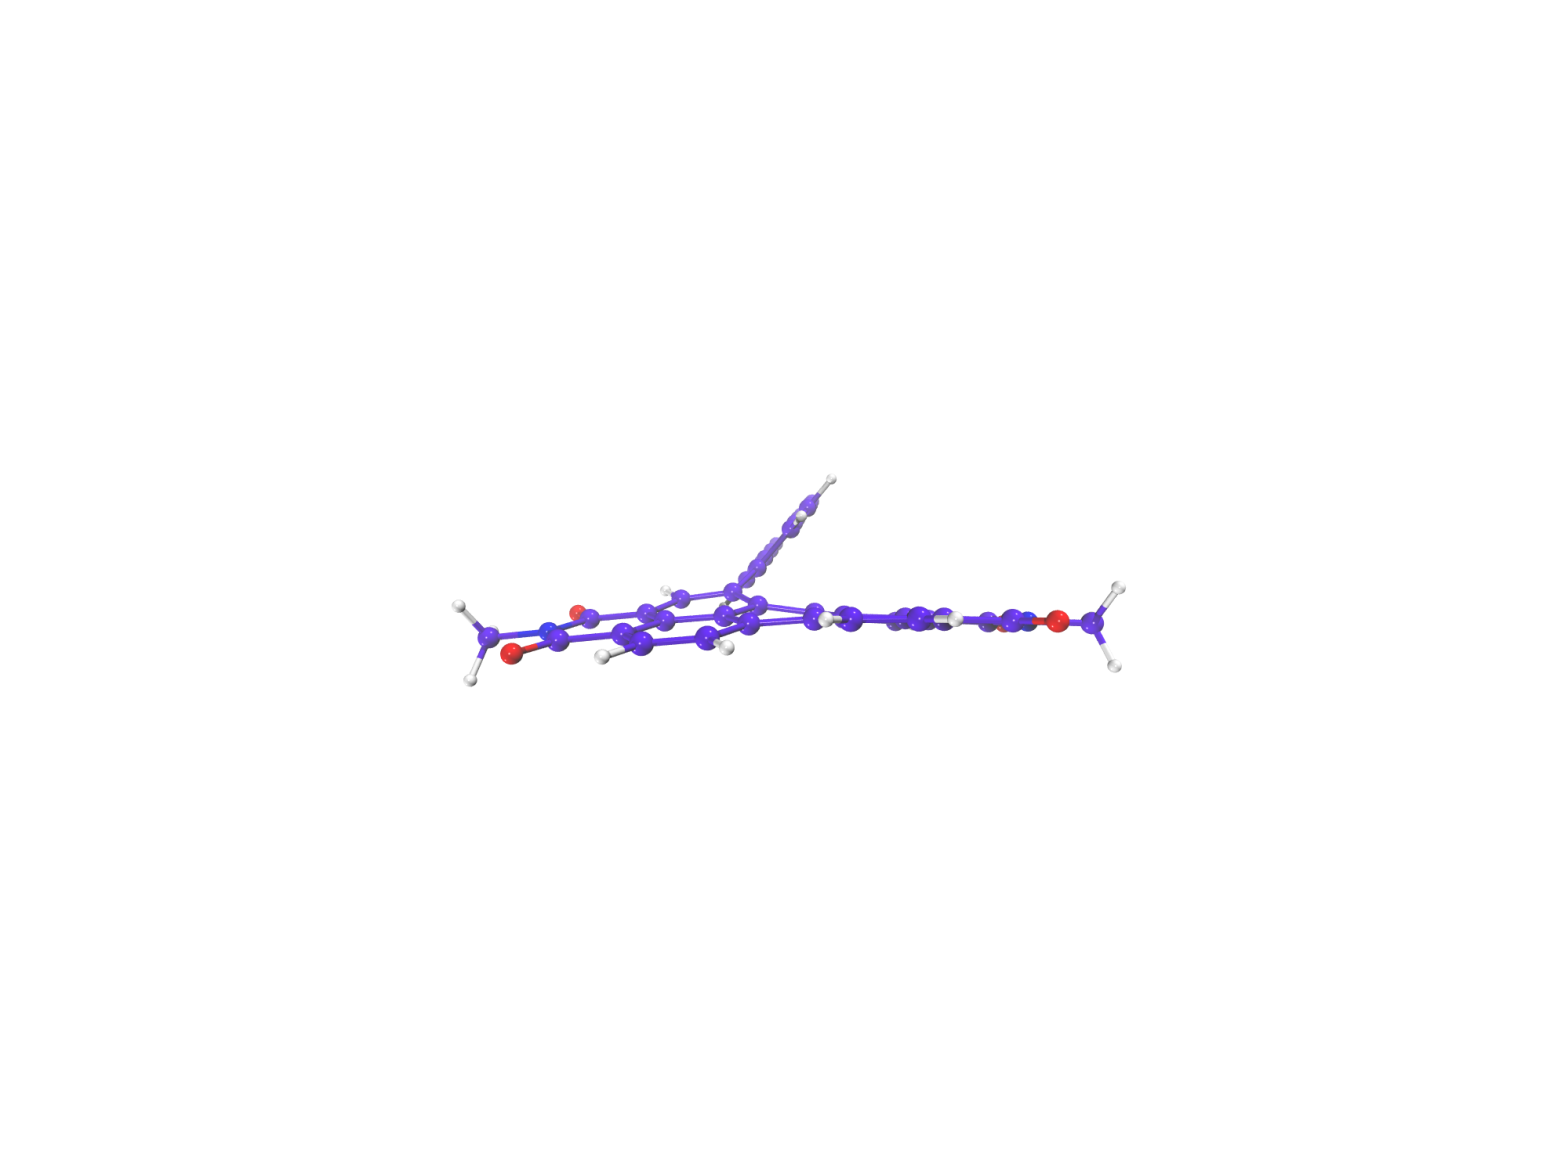


**SupplementaryFigure 30.**Theoptimized S1 of B-PDI-ANT.

**
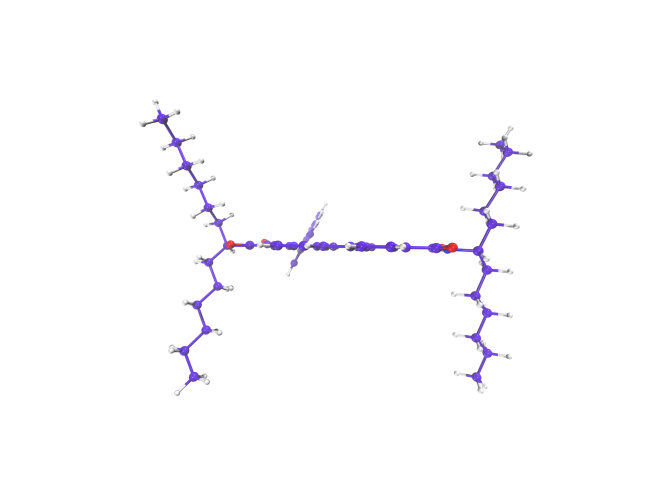
**

**SupplementaryFigure 31.**Theoptimized S0 of O-PDI-ANT.


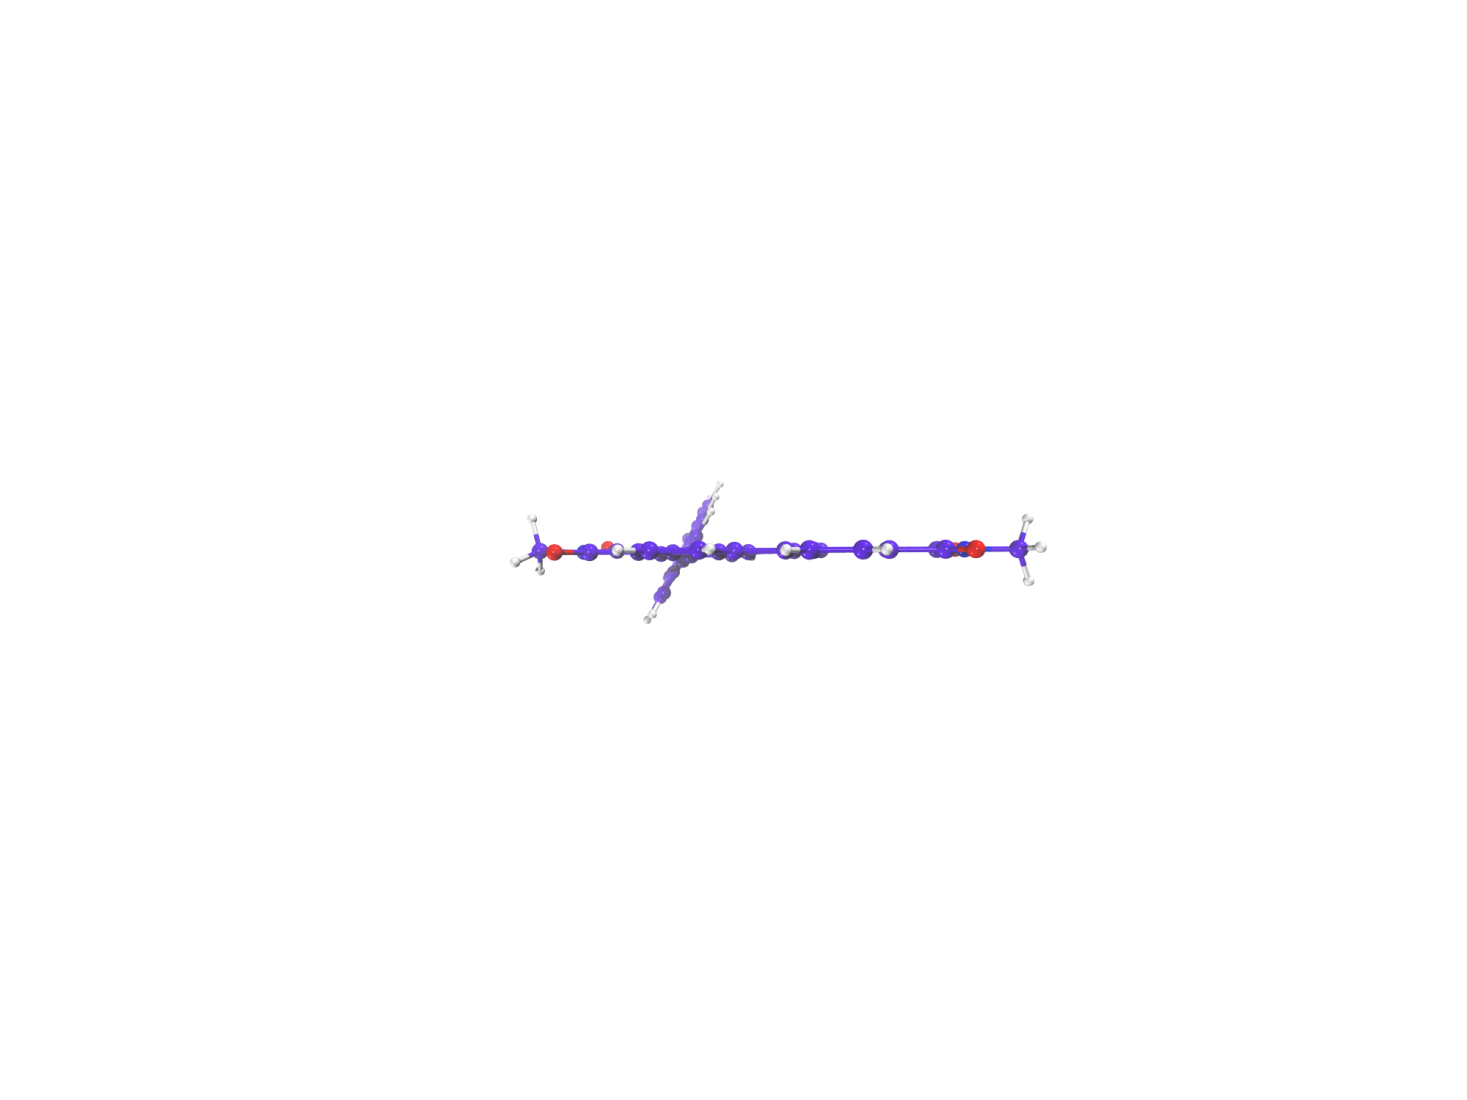


**SupplementaryFigure 32.**Theoptimized S1 of O-PDI-ANT.

## 2.7 The optimized molecular orbital (MO) diagrams of B-PDI-ANT and O-PDI-ANT


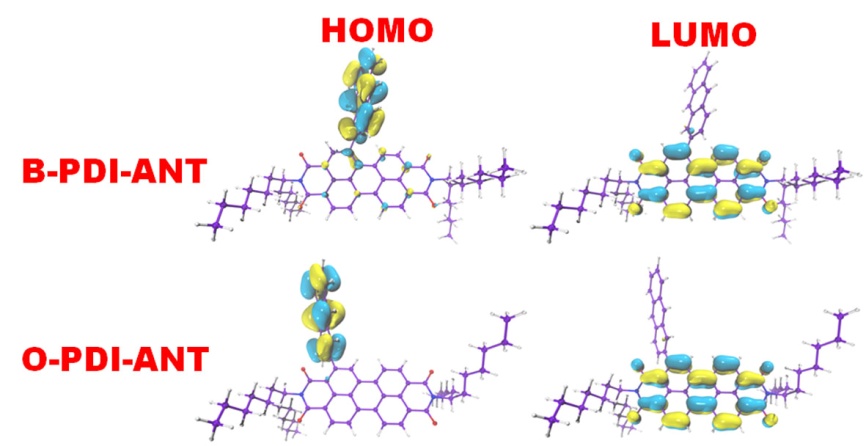


**SupplementaryFigure 33.**Theoptimized HOMO and LUMO of B-PDI-ANT andO-PDI-ANT.

## 2.8 The summary of the previously reported 2PA data for small organic molecules containing one or two PDI unit in recent ten years from 2011-2021

**Supplementary Table 3**.Summary of the previously reported 2PA data for small organic molecules containing one or two PDI unit in recent ten years from 2011-2021.

| Dyes | Method | Solvent | λ2PA/  nm | δ/  GM | Refer-ence |
| --- | --- | --- | --- | --- | --- |
|  | fs-TPEF | toluene | 625 | 1075 | 47 |
|  | fs-TPEF | dichloro-  methane | 720 | 324 | 48 |
|  | fs-TPEF | toluene | 669 | 470 | 49 |
|  | fs-TPEF | toluene | 1220 | 1110 | 50 |
|  | fs-TPEF | acetoni-  trile | 850 | 180 | 51 |
|  | fs Z-scan | dichloro-  methane | 800 | 1073 | 52 |
|  | fs Z-scan | dichloro-  methane | 900 | 140 | 53 |
|  | fs-TPEF | chloro-  form | 800 | 125 | 54 |
|  | fs Z-scan | dichloro-  methane | 639 | 3340 | 55 |
|  | fs-TPEF | chloro-  form | 800 | 18.4 | 56 |
|  | fs-TPEF | THF | 1100 | 1104 | 57 |
|  | fs Z-scan | THF | 650 | 2400 | 58 |

# 3. References

**1. (a) Holman, M. W.; Liu, R.; Adams, D. M., Single-Molecule Spectroscopy of Interfacial Electron Transfer. *Journal of the American Chemical Society* 2003, *125* (41), 12649-12654;****(b) Davis, N. J. L. K.; MacQueen, R. W.; Roberts, D. A.; Danos, A.; Dehn, S.; Perrier, S.; Schmidt, T. W., Energy transfer in pendant perylene diimide copolymers. *Journal of Materials Chemistry C* 2016, *4* (35), 8270-8275;****(c) Xu, L.; Li, Y.; Jiang, R.; Qin, Z.; Li, Y., 2,6-Anthracenyl(anthraquinonyl)-substituted difluoroboron dipyrromethenes: Synthesis, spectroscopy, electrochemistry and quantum chemical calculations. *Dyes and Pigments* 2014, *107*, 90-96.**

**2. (a) Teraoka, T.; Hiroto, S.; Shinokubo, H., Iridium-Catalyzed Direct Tetraborylation of Perylene Bisimides. *Organic Letters* 2011, *13* (10), 2532-2535;****(b) Han, H.; Ma, L.-K.; Zhang, L.; Guo, Y.; Li, Y.; Yu, H.; Ma, W.; Yan, H.; Zhao, D., Tweaking the Molecular Geometry of a Tetraperylenediimide Acceptor. *ACS Applied Materials & Interfaces* 2019, *11* (7), 6970-6977.**
